# Supplementary material
Source: PubMed Central journal article supplement (PMC7523750)
Supplement: NIHMS1630598-supplement-sTable1.pdf [file NIHMS1630598-supplement-sTable1.pdf]

**Supplementary table 1. Molecular diagnosis-based ongoing clinical trials for DIPG**

| Clinical trial                                   | Title                                                                                                                                                          | Inclusion Criteria for DIPG                                                                                                                                                                                                                                                            | Intervention                                                                                                                                                                                                                                                                                                                                                                                               | Purpose                                                                                                                                                                                                                                                                                                  |
|--------------------------------------------------|----------------------------------------------------------------------------------------------------------------------------------------------------------------|----------------------------------------------------------------------------------------------------------------------------------------------------------------------------------------------------------------------------------------------------------------------------------------|------------------------------------------------------------------------------------------------------------------------------------------------------------------------------------------------------------------------------------------------------------------------------------------------------------------------------------------------------------------------------------------------------------|----------------------------------------------------------------------------------------------------------------------------------------------------------------------------------------------------------------------------------------------------------------------------------------------------------|
| NCT03416530<br>(Phase 1, Recruiting)             | ONC201 in Newly Diagnosed Diffuse Intrinsic Pontine Glioma and Recurrent/Refractory Pediatric H3 K27M Gliomas                                                  | 1) 2 to less than 19 years of age. 2) Arm B: Patients with newly diagnosed diffuse intrinsic pontine glioma (DIPG) are eligible with or without histologic confirmation. Post-mortem biopsy is required if H3 K27M status of tumor is unknown and archival tumor tissue not available. | Drug: ONC201. ONC201 is an orally active, small molecule DRD2 antagonist that kills cancer cells but not normal cells.                                                                                                                                                                                                                                                                                     | Arm B will define the recommended Phase 2 dose for ONC201 in combination with radiation in pediatric patients with newly diagnosed DIPG.                                                                                                                                                                 |
| NCT03352427<br>(Phase 2, Recruiting)             | Study of Dasatinib in Combination With Everolimus for Children and Young Adults With Gliomas Harboring PDGFR/FGFR Alterations                                  | Histological confirmation of a newly diagnosed high-grade glioma or DIPG (Stratum A)                                                                                                                                                                                                   | Drug: Dasatinib 60 mg/m <sup>2</sup> orally twice daily<br>Drug: Everolimus 3.0 mg/m <sup>2</sup> , with titration of dosing after first cycle to keep trough level of 5-15 ug/ml                                                                                                                                                                                                                          | This trial will evaluate the activity of dasatinib in combination with everolimus for children with gliomas harboring PDGFR or FGFR                                                                                                                                                                      |
| NCT01644773<br>(Phase 1; Active, not recruiting) | Phase I Study of the Combination of Crizotinib and Dasatinib in Pediatric Research Participants With Diffuse Pontine Glioma (DIPG) and High-Grade Glioma (HGG) | Diagnosis of recurrent or progressive HGG or DIPG.                                                                                                                                                                                                                                     | Drug: Crizotinib      Drug: Dasatinib                                                                                                                                                                                                                                                                                                                                                                      | To find the highest tolerable dose of crizotinib and dasatinib given in combination to patients with diffuse intrinsic pontine glioma (DIPG) and other types of high grade                                                                                                                               |
| NCT02960230<br>(Phase 1, Recruiting)             | H3.3K27M Peptide Vaccine for Children With Newly Diagnosed DIPG and Other Gliomas                                                                              | Newly diagnosed children (3-21 years old) with DIPG who are positive for the H3.3K27M mutation (positive testing in CLIA laboratory) that underwent standard radiation therapy.                                                                                                        | Biological: K27M peptide. K27M peptide vaccine, combined with Tetanus Toxoid peptide, emulsified in montanide. Poly-ICLC will be given concurrently                                                                                                                                                                                                                                                        | This study will assess the safety of repeated administration of the H3.3K27M specific vaccine in HLA-A2+ children and young adults with H3.3K27M DIPGs and other gliomas                                                                                                                                 |
| NCT02717455<br>(Phase 1, Recruiting)             | Phase 1 Trial of Panobinostat in Children With Diffuse Intrinsic Pontine Glioma                                                                                | STRATUM 1: Patients with progressive DIPG. STRATUM 2: Patients with DIPG who have not yet progressed by clinical or radiographic criteria.                                                                                                                                             | Drug: LBH589 (Panobinostat)                                                                                                                                                                                                                                                                                                                                                                                | This phase 1 trial studies the side effects and best dose of panobinostat in treating younger patients with diffuse intrinsic pontine glioma (DIPG)                                                                                                                                                      |
| NCT02274987<br>(Active, not recruiting)          | Molecular Profiling for Individualized Treatment Plan for DIPG                                                                                                 | Patients with newly diagnosed DIPG, who undergo a biopsy are eligible. Patients with disseminated disease are not eligible, and MRI of the spine must be performed if disseminated disease is suspected by the treating physician.                                                     | Other: Specialized tumor board recommendation<br>A combination of up to four FDA approved drugs based on the molecular profile of the patient's tumor as determined by gene expression analysis, WES and predictive modeling.<br>Radiation: Standard radiation therapy<br>Initial therapy will consist of standard radiation therapy per institutional guidelines followed by molecular based therapy with | This is a single arm multi-center pilot trial within the Pacific Pediatric Neuro-Oncology Consortium (PNOC). The current study will use a new treatment approach based on each patient's tumor genomic profiling consisting of whole exome sequencing and RNA sequencing as well as predictive modeling. |
