# Supplementary material
Source: PubMed Central journal article supplement (PMC7523750)
Supplement: NIHMS1630598-supplement-sTable2.pdf [file NIHMS1630598-supplement-sTable2.pdf]

Supplementary table 2. Tumor characteristics and the detection of CSF-cDNA

| Patient | Sex | Age | Diagnosis | Tumor Grade | Tumor location    | DIPG | Enhancement | Tumor volume (cm3) | Location of CSF sampling   | Tumor abutting CSF | Mutated genes detected in tumor tissue                                               | Mutated genes detected in CSF cDNA              | Consistency (CSF/Tumor tissue) | Comparison | Outcome | Overall survival (months) |
|---------|-----|-----|-----------|-------------|-------------------|------|-------------|--------------------|----------------------------|--------------------|--------------------------------------------------------------------------------------|-------------------------------------------------|--------------------------------|------------|---------|---------------------------|
| RE149   | F   | 27  | AA        | 3           | Pontine           | No   | No          | 23.9               | Cerebellomedullary cistern | Yes                | IDH1, TP53, ATRX                                                                     | IDH1, TP53, ATRX                                | Totally consistent(3/3)        | CSF=T      | Alive   | 40.2                      |
| RE152   | F   | 34  | A         | 2           | Pontine           | No   | No          | 25.8               | Cerebellomedullary cistern | Yes                | IDH1,TP53, ATRX                                                                      | IDH1,TP53, ATRX                                 | Totally consistent(3/3)        | CSF=T      | Alive   | 15.4                      |
| RD760   | F   | 9   | GG        | 1           | Lateral Ventricle | —    | Yes         | 52.18              | Lateral ventricle          | Yes                | H3F3A,TP53                                                                           | H3F3A, TP53                                     | Totally consistent (2/2)       | CSF=T      | Dead    | 15.0                      |
| RD899   | M   | 12  | AO        | 3           | Medulla           | —    | Yes         | 8.94               | Cerebellomedullary cistern | Yes                | H3F3A, PPM1D, ATRX, FGFR1, NF1                                                       | H3F3A, PPM1D, ATRX, FGFR1, NF1                  | Totally consistent (5/5)       | CSF=T      | Dead    | 3.7                       |
| RD998   | F   | 45  | E         | 2           | Medulla           | —    | Yes         | 0.95               | Cerebellomedullary cistern | Yes                | ACVR1                                                                                | ACVR1                                           | Totally consistent(1/1)        | CSF=T      | Alive   | 17.0                      |
| RE153   | F   | 53  | A         | 2           | Medulla           | —    | No          | 4.21               | Cerebellomedullary cistern | Yes                | H3F3A, TPT3, PPM1D                                                                   | H3F3A, TPT3, PPM1D                              | Totally consistent(3/3)        | CSF=T      | Alive   | 14.4                      |
| RE974   | F   | 44  | A         | 2           | Medulla           | —    | No          | 7.93               | Cerebellomedullary cistern | Yes                | H3F3A, NF1                                                                           | H3F3A, NF1                                      | Totally consistent(2/2)        | CSF=T      | Dead    | 8.5                       |
| RD516   | F   | 4   | PMA       | 1           | Medulla           | —    | Yes         | 9.35               | Cerebellomedullary cistern | Yes                | BRAF,KIAA1549                                                                        | BRAF,KIAA1549                                   | Totally consistent (1/1)       | CSF=T      | Alive   | 12.0                      |
| RE671   | M   | 49  | AA        | 3           | Midbrain          | —    | Yes         | 5.83               | Basal cistern              | Yes                | H3F3A, TP53, PDGFRA                                                                  | H3F3A, TP53, PDGFRA                             | Totally consistent(3/3)        | CSF=T      | Alive   | 13.7                      |
| RE665   | F   | 46  | GBM       | 4           | MP                | —    | Yes         | 21.58              | Basal cistern              | Yes                | HIST1H3B, TP53, PDGFRA                                                               | HIST1H3B, TP53, PDGFRA                          | Totally consistent(3/3)        | CSF=T      | Dead    | 1.7                       |
| RD887   | F   | 37  | SE        | 1           | MP                | —    | No          | 4.55               | Basal cistern              | Yes                | H3F3A                                                                                | Negative                                        | Inconsistent                   | CSF<T      | Alive   | 18.0                      |
| RE965   | F   | 12  | GBM       | 4           | PO                | —    | No          | 21.1               | Basal cistern              | Yes                | H3F3A, MET, PPM1D                                                                    | H3F3A, MET, PPM1D                               | Totally consistent(3/3)        | CSF=T      | Dead    | 2.2                       |
| RE970   | F   | 40  | A         | 2           | PO                | —    | No          | 28.5               | Cerebellomedullary cistern | Yes                | IDH1, TP53, ATRX, FAT1                                                               | IDH1, TP53, ATRX, FAT1                          | Totally consistent(4/4)        | CSF=T      | Dead    | 141.2                     |
| RD569   | M   | 12  | GBM       | 4           | Pontine           | Yes  | Yes         | 41.52              | Spinal subarachnoid space  | Yes                | H3F3A, PTEN, TP53                                                                    | H3F3A, PTEN, TP53                               | Totally consistent (3/3)       | CSF=T      | Dead    | 1.7                       |
| RE147   | M   | 12  | GBM       | 4           | Pontine           | Yes  | No          | 35.09              | Cerebellomedullary cistern | Yes                | H3F3A, TP53                                                                          | H3F3A, TP53                                     | Totally consistent(2/2)        | CSF=T      | Alive   | 16.0                      |
| RE150   | M   | 5.8 | GBM       | 4           | Pontine           | Yes  | Yes         | 12.75              | Cerebellomedullary cistern | Yes                | HIST1H3B, ACVR1, PIK3CA                                                              | HIST1H3B, ACVR1, PIK3CA                         | Totally consistent(3/3)        | CSF=T      | Dead    | 9.0                       |
| RE963   | M   | 7   | GBM       | 4           | Pontine           | Yes  | Yes         | 24.39              | Cerebellomedullary cistern | Yes                | H3F3A, TP53, PTEN                                                                    | H3F3A, TP53, PTEN                               | Totally consistent(3/3)        | CSF=T      | Dead    | 8.5                       |
| RF178   | F   | 10  | GBM       | 4           | Pontine           | Yes  | Yes         | 13.87              | Cerebellomedullary cistern | Yes                | H3F3A, TP53                                                                          | H3F3A, TP53                                     | Totally consistent(2/2)        | CSF=T      | Alive   | 15.0                      |
| RD993   | F   | 6   | DMG       | 4           | Pontine           | Yes  | No          | 45.97              | Cerebellomedullary cistern | Yes                | H3F3A, TP53                                                                          | H3F3A, TP53, PDGFRA, BRAF, FAT1                 | Consistent(2/2)                | CSF>T      | Dead    | 4.0                       |
| RE664   | F   | 5   | GBM       | 4           | Pontine           | Yes  | Yes         | 12.42              | Cerebellomedullary cistern | Yes                | H3F3A,TP53                                                                           | H3F3A, TP53                                     | Totally consistent(2/2)        | CSF=T      | Dead    | 13.2                      |
| RF007   | M   | 44  | GBM       | 4           | Pontine           | No   | Yes         | 11.1               | Cerebellomedullary cistern | Yes                | PIK3CA, PPM1D                                                                        | HIST1H3B, NF1, PIK3CA, PPM1D                    | Consistent (2/2)               | CSF>T      | Dead    | 20.7                      |
| RF010   | F   | 6   | GBM       | 4           | Pontine           | Yes  | Yes         | 26.83              | Cerebellomedullary cistern | Yes                | TP53, EGFR, PMS2, SETD2, ATRX, FGFR1, PDGFRA, PIK3R1, BRCA2, FGFR3, MLH1, MSH6, MSH2 | H3F3A,TP53, EGFR, PMS2, SETD2                   | Consistent (4/13)              | CSF<T      | Dead    | 3.0                       |
| RF181   | M   | 6   | DMG       | 4           | Pontine           | Yes  | No          | 14.89              | Cerebellomedullary cistern | Yes                | H3F3A, TP53, PTEN                                                                    | H3F3A, TP53                                     | Consistent (2/3)               | CSF<T      | Dead    | 7.0                       |
| RE964   | M   | 25  | GBM       | 4           | Pontine           | Yes  | Yes         | 13.38              | Basal cistern              | Yes                | H3F3A, TP53                                                                          | H3F3A, EGFR                                     | Consistent (1/2)               | CSF<T      | Dead    | 14.5                      |
| RD757   | F   | 7   | AO        | 3           | Pontine           | Yes  | Yes         | 36.38              | Spinal subarachnoid space  | Yes                | HIST1H3B, ACVR1, TP53, BCOR                                                          | HIST1H3B, ACVR1, TP53, BCOR                     | Totally consistent (4/4)       | CSF=T      | Dead    | 5.0                       |
| RD762   | M   | 8   | AA        | 3           | Pontine           | Yes  | Yes         | 45.19              | Cerebellomedullary cistern | Yes                | H3F3A, PPM1D, PIK3CA                                                                 | H3F3A, PPM1D, PIK3CA                            | Totally consistent(3/3)        | CSF=T      | Alive   | 9.0                       |
| RD997   | F   | 18  | AA        | 3           | Pontine           | No   | No          | 3.33               | Cerebellomedullary cistern | Yes                | H3F3A                                                                                | H3F3A                                           | Totally consistent(1/1)        | CSF=T      | Alive   | 24.0                      |
| RE002   | F   | 6   | AA        | 3           | Pontine           | Yes  | No          | 74.35              | Cerebellomedullary cistern | Yes                | H3F3A, TP53(p.Arg248Gln, p.Arg158Leu)                                                | H3F3A, TP53(p.Arg248Gln, p.Arg158Leu)           | Totally consistent(2/2)        | CSF=T      | Dead    | 5.5                       |
| RE669   | M   | 15  | AA        | 3           | Pontine           | Yes  | No          | 55.65              | Cerebellomedullary cistern | Yes                | H3F3A, TP53                                                                          | H3F3A, TP53                                     | Totally consistent(2/2)        | CSF=T      | Dead    | 16.3                      |
| RE966   | F   | 5.5 | AOA       | 3           | Pontine           | Yes  | Yes         | 40.79              | Cerebellomedullary cistern | Yes                | H3F3A                                                                                | H3F3A                                           | Totally consistent(1/1)        | CSF=T      | Dead    | 9.7                       |
| RF008   | M   | 8   | AOA       | 3           | Pontine           | Yes  | Yes         | 17.25              | Cerebellomedullary cistern | Yes                | H3F3A, TP53, PDGFRA                                                                  | H3F3A, TP53, PDGFRA                             | Totally consistent(3/3)        | CSF=T      | Dead    | 2.2                       |
| RF177   | F   | 50  | AA        | 3           | Pontine           | No   | Yes         | 8.67               | Cerebellomedullary cistern | Yes                | H3F3A, FGFR1, BCOR                                                                   | H3F3A, FGFR1, BCOR                              | Totally consistent(3/3)        | CSF=T      | Alive   | 15.0                      |
| RE662   | M   | 23  | AA        | 3           | Pontine           | Yes  | Yes         | 18.38              | Cerebellomedullary cistern | Yes                | H3F3A, TP53, ATRX, PIK3CA                                                            | H3F3A, ARTX                                     | Consistent(2/4)                | CSF<T      | Dead    | 8.9                       |
| RF182   | F   | 7   | AA        | 3           | Pontine           | Yes  | Yes         | 26.83              | Basal cistern              | Yes                | H3F3A, TP53(p.Arg280 Gly), PIK3CA                                                    | H3F3A, TP53(p.Arg280 Gly, p.Arg273Cys ), PIK3CA | Consistent (3/3)               | CSF>T      | Dead    | 2.0                       |
| RE151   | M   | 34  | A         | 2           | Pontine           | Yes  | No          | 21.2               | Cerebellomedullary cistern | Yes                | IDH1,TP53                                                                            | IDH1,TP53                                       | Totally consistent(2/2)        | CSF=T      | Alive   | 129.4                     |
| RD748   | M   | 11  | O         | 2           | Pontine           | Yes  | Yes         | 52.91              | Spinal subarachnoid space  | Yes                | HIST1H3B, ACVR1, PIK3CA                                                              | HIST1H3B, ACVR1                                 | Consistent(2/3)                | CSF<T      | Alive   | 20.0                      |
| RF009   | M   | 56  | AOA       | 3           | TM                | —    | No          | 11.01              | Lateral ventricle          | Yes                | H3F3A, TP53, PDGFRA                                                                  | H3F3A, TP53, PDGFRA                             | Totally consistent(3/3)        | CSF=T      | Dead    | 10.0                      |

AA, anaplastic ependymoma; SE, subependymoma; MB-LCA, Large cell/anaplastic medulloblastoma; MB-C, classic medulloblastoma; MB-D, Desmoplastic / nodular medulloblastoma; TM, thalamus and midbrain; MP, midbrain and pontine; PO, pontine and medullary oblongata.
