# Supplementary material
Source: PubMed Central journal article supplement (PMC7523750)
Supplement: NIHMS1630598-supplement-sTable3.pdf [file NIHMS1630598-supplement-sTable3.pdf]

**Supplementary table 3.** Associations between clinical characteristics and detection of CSF ctDNA.

| Characteristic assessed             | All patients<br>(n=57) | CSF detected<br>(n=47) | CSF undetected<br>(n=10) | P value            |
|-------------------------------------|------------------------|------------------------|--------------------------|--------------------|
| <b>Age (y) median (range)</b>       | 12.0 (3.7-56.0)        | 12.0 (3.7-56.0)        | 15.5 (5.5-49.0)          | 0.431              |
| <b>Sex, no. (%)</b>                 |                        |                        |                          | 0.869              |
| Female                              | 27 (47.4)              | 23 (48.9)              | 4 (40.0)                 |                    |
| Male                                | 30 (52.6)              | 24 (51.1)              | 6 (60.0)                 |                    |
| <b>Tumor grade, no. (%)</b>         |                        |                        |                          | <b>0.001</b>       |
| 1                                   | 7 (12.3)               | 2 (4.3)                | 5 (50.0)                 |                    |
| 2                                   | 14 (24.6)              | 12 (25.5)              | 2 (20.0)                 |                    |
| 3                                   | 16 (28.1)              | 15 (31.9)              | 1 (10.0)                 |                    |
| 4                                   | 18 (31.6)              | 17 (36.2)              | 1 (10.0)                 |                    |
| Inconclusive                        | 2 (3.5)                | 1 (2.1)                | 1 (10.0)                 |                    |
| <b>Tumor grade, no. (%)</b>         |                        |                        |                          | <b>0.022</b>       |
| 1 and 2                             | 21 (36.8)              | 14 (29.8)              | 7 (70.0)                 |                    |
| 3 and 4                             | 34 (59.6)              | 32 (68.1)              | 2 (20.0)                 |                    |
| Inconclusive                        | 2 (3.5)                | 1 (2.1)                | 1 (10.0)                 |                    |
| <b>Enhancing CT or MRI, no. (%)</b> |                        |                        |                          | 0.741              |
| No                                  | 23 (40.4)              | 18 (38.3)              | 5 (50.0)                 |                    |
| Yes                                 | 34 (59.6)              | 29 (61.7)              | 5 (50.0)                 |                    |
| <b>Tumor location, no. (%)</b>      |                        |                        |                          | 0.169 <sup>a</sup> |
| Pontine                             | 30 (52.6)              | 27 (57.4)              | 3 (30)                   |                    |
| 4 <sup>th</sup> ventricle           | 4 (7.0)                | 4 (8.5)                | 0 (0)                    |                    |
| Medullary                           | 9 (15.8)               | 6 (12.8)               | 3 (30)                   |                    |
| Midbrain                            | 3 (5.3)                | 2 (4.3)                | 1 (10)                   |                    |
| MP                                  | 2 (3.5)                | 1(2.1)                 | 1 (10)                   |                    |
| PO                                  | 2 (3.5)                | 2 (4.3)                | 0 (0)                    |                    |
| TM                                  | 3 (5.3)                | 3 (6.4)                | 0 (0)                    |                    |
| Thalamus                            | 2 (3.5)                | 1 (2.1)                | 1 (10)                   |                    |
| Temporal lobe                       | 1 (1.8)                | 0 (0)                  | 1(10)                    |                    |
| Lateral ventricle                   | 1 (1.8)                | 1 (2.1)                | 0 (0)                    |                    |
| <b>Abutting CSF space, no. (%)</b>  |                        |                        |                          | <b>0.028</b>       |
| Yes                                 | 55 (96.5)              | 47 (100)               | 8 (80)                   |                    |
| No                                  | 2 (3.5)                | 0 (0)                  | 2 (20)                   |                    |
| <b>Symptom duration</b>             |                        |                        |                          | 0.05               |
| Median (range)                      | 3.0(0.5-120)           | 2.0 (0.5-120)          | 4.5 (2.5-24)             |                    |
| <b>Tumor size</b>                   |                        |                        |                          | 0.097              |
| Median (range)                      | 20.2 (0.95-74.35)      | 21.2 (0.95-74.35)      | 8.96 (1.52-61.24)        |                    |
| <b>Quantity of DNA in CSF (ng)</b>  |                        |                        |                          | <b>0.022</b>       |
| Median (range)                      | 25.0(5.2-1845.0)       | 25.7 (5.5-1845.0)      | 12.2 (5.2-58.5)          |                    |

<sup>a</sup> p value for the comparison between Pontine/MP/PO vs. Midbrain/Medulla, Chi-square test
