# Supplementary material
Source: PubMed Central journal article supplement (PMC7523750)
Supplement: NIHMS1630598-supplement-sTable4.pdf [file NIHMS1630598-supplement-sTable4.pdf]

**Supplementary table 4.** Univariate analyses to identify clinical characteristics associated with the detection of CSF ctDNA.

| Characteristic assessed in univariate analysis | Odds ratio (95% confidence) | P value      |
|------------------------------------------------|-----------------------------|--------------|
| <b>Univariate logistic regression</b>          |                             |              |
| Age                                            | 0.95-1.032                  | 0.643        |
| Sex, male vs. female                           | 0.359-5.762                 | 0.608        |
| <b>Tumor grade.</b>                            |                             |              |
| I vs. II-IV                                    | 0.005-0.251                 | <b>0.001</b> |
| I and II vs. III and IV                        | 0.023-0.679                 | <b>0.016</b> |
| <b>Enhancing imaging, yes vs. no</b>           | 0.157-2.448                 | 0.496        |
| <b>Tumor location</b>                          |                             |              |
| pontine vs. midbrain and/or medulla            |                             |              |
| <b>Abutting CSF space, yes vs. no</b>          | 0- $\infty$                 | 0.999        |
| History                                        | 0.966-1.053                 | 0.687        |
| Tumor size                                     | 0.982-1.074                 | 0.237        |
| Quantity of DNA in CSF                         | 0.988-1.083                 | 0.152        |
