# Supplementary material
Source: PubMed Central journal article supplement (PMC7523750)
Supplement: NIHMS1630598-supplement-sTable5.pdf [file NIHMS1630598-supplement-sTable5.pdf]

**Supplementary table 5. The 68 genes involved in the panel used for this study.**

Sequence analyses for 68 well-characterized cancer genes.

Rearrangement analyses (\*) for selected regions of 4 well-characterized cancer genes.

Sequence and copy number analyses (red font) for the coding regions of 8 well-characterized cancer.

|             |          |         |            |       |               |            |
|-------------|----------|---------|------------|-------|---------------|------------|
| ACVR1       | AKT1     | ATRX    | BCOR       | *BRAF | BRCA1         | BRCA2      |
| <b>CDK6</b> | CDKN2A   | CDKN2B  | CHEK2      | CIC   | CTNNB1        | DAXX       |
| <b>EGFR</b> | FAT1     | FGFR1   | *FGFR3     | FUBP1 | GNAQ          | GNAS       |
| HIST1H3B    | HIST1H3C | HRAS    | IDH1       | IDH2  | <b>KDR</b>    | <b>KIT</b> |
| KRAS        | MDM4     | MEN1    | <b>MET</b> | MLH1  | MSH2          | MSH6       |
| MYCN        | NF1      | NF2     | NOTCH1     | NRAS  | <b>PDGFRA</b> | PIK3CA     |
| PLCG1       | PMS2     | PPM1D   | PTCH1      | PTEN  | PTPN11        | RB1        |
| RGPD3       | SETD2    | SMARCB1 | SMARCE1    | SMO   | TERT          | TP53       |
| TSC1        | TSC2     | USP8    | *YAP1      |       |               |            |

---

CDK4

---

DDX3X

---

H3F3A

---

KLF4

---

MYC

---

PIK3R1

---

\*RELA

---

TRAF7

---

---
