# Supplementary material
Source: PubMed Central journal article supplement (PMC7523750)
Supplement: NIHMS1630598-supplement-sTable6.pdf [file NIHMS1630598-supplement-sTable6.pdf]

Table S5. Mutations identified in tumor tissue, cerebrospinal fluid and plasma.

| Patient | gene     | position            | variant            | DNA_change           | AA_change            | tissue   |           | CSF      |           | plasma   |              |
|---------|----------|---------------------|--------------------|----------------------|----------------------|----------|-----------|----------|-----------|----------|--------------|
|         |          |                     |                    |                      |                      | depth    | frequency | depth    | frequency | depth    | frequency    |
| RD516   | BRAF     | KIAA1549(NM_018826) | fusion_variant     | BRAF:KIAA1549 fusion | BRAF:KIAA1549 fusion | 2221     | 0.0782    | 489.95   | 0.0263    |          |              |
| RD533   |          |                     |                    |                      |                      |          |           |          |           |          | no sample    |
|         | H3F3A    | chr1:226252135      | missense_variant   | c.83A>T              | p.Lys28Met           | 2019     | 0.512     | 236      | 0.5       |          |              |
|         | PTEN     | chr17:7578457       | frameshift_variant | c.389delG            | p.Arg130GlnfsTer4    | 920      | 0.799     | 506      | 0.16403   |          |              |
|         | TP53     | chr10:89692905      | missense_variant   | c.473G>C             | p.Arg158Pro          | 2487     | 0.928     | 578      | 0.86111   |          |              |
|         | PIK3CA   | chr3:178952085      | missense_variant   | c.3140A>G            | p.His1047Arg         | 1126     | 0.446     | negative | negative  |          |              |
|         | ACVR1    | chr2:158626898      | missense_variant   | c.772A>G             | p.Arg258Gly          | 2153     | 0.623     | 291      | 0.03093   |          |              |
|         | HIST1H3B | chr6:26032206       | missense_variant   | c.83A>T              | p.Lys28Met           | 1410     | 0.475     | 358      | 0.02514   |          |              |
|         | ACVR1    | chr2:158622516      | missense_variant   | c.983G>A             | p.Gly328Glu          | 1985     | 0.414     | 337      | 0.08309   |          | 2020 0.00198 |
|         | TP53     | chr17:7577120       | missense_variant   | c.818G>A             | p.Arg273His          | 1652     | 0.784     | 310      | 0.08065   |          | 2207 0.00498 |
|         | BCOR     | chrX:39930357       | frameshift_variant | c.3107delC           | p.Pro1036GlnfsTer19  | 3173     | 0.413     | 247      | 0.04453   | negative | negative     |
|         | HIST1H3B | chr6:26032206       | missense_variant   | c.83A>T              | p.Lys28Met           | 1704     | 0.413     | 272      | 0.12132   | negative | negative     |
| RD758   | NF1      | chr17:29663445      | inframe_deletion   | c.6103_6111delGCTGT  | p.Ala2035_Ala2037del |          |           | 2575     | 0.00272   |          |              |
| RD759   |          |                     |                    |                      |                      |          |           |          |           |          |              |
|         | H3F3A    | chr1:226252135      | missense_variant   | c.83A>T              | p.Lys28Met           | 1524     | 0.441     | 1883     | 0.04249   | negative | negative     |
|         | TP53     | chr17:7577538       | missense_variant   | c.743G>A             | p.Arg248Gln          | 831      | 0.739     | 1889     | 0.05992   | negative | negative     |
| RD761   |          |                     |                    |                      |                      |          |           |          |           |          |              |
|         | H3F3A    | chr1:226252135      | missense_variant   | c.83A>T              | p.Lys28Met           | 4069     | 0.62      | 815      | 0.586     | negative | negative     |
|         | PIK3CA   | chr3:178936091      | missense_variant   | c.1633G>A            | p.Glu545Lys          | 1764     | 0.425     | 1074     | 0.35415   | negative | negative     |
|         | PPM1D    | chr17:58740439      | frameshift_variant | c.1349delT           | p.Leu450Ter          | 3558     | 0.456     | 2748     | 0.23617   | negative | negative     |
|         | H3F3A    | chr1:226252135      | missense_variant   | c.83A>T              | p.Lys28Met           |          |           | 1979     | 0.36318   |          |              |
|         | PDGFRA   | chr4:55133559       | missense_variant   | c.863A>G             | p.Tyr288Cys          |          |           | 19563    | 0.45336   |          |              |
|         | FAT1     | chr4:187518024      | missense_variant   | c.12670G>A           | p.Ala4224Thr         |          |           | 3579     | 0.48615   |          |              |
|         | TP53     | chr17:7577568       | missense_variant   | c.713G>A             | p.Cys238Tyr          |          |           | 2452     | 0.68982   |          |              |
|         | ATRX     | chrX:76939960       | stop_gained        | c.788G>A             | p.Trp263Ter          |          |           | 1864     | 0.6604    |          |              |
|         | TSC1     | chr9:135785965      | missense_variant   | c.1253C>G            | p.Pro418Arg          |          |           | 2707     | 0.49889   |          |              |
|         | TERT     | chr5:1280274        | missense_variant   | c.1949G>A            | p.Arg650Lys          |          |           | 4881     | 0.45348   |          |              |
|         | BCOR     | chrX:39932171       | stop_gained        | c.2428C>T            | p.Arg810Ter          |          |           | 2674     | 0.84494   |          |              |
|         | MET      | chr7:116339770      | missense_variant   | c.6321>G             | p.Leu211Trp          |          |           | 9217     | 0.46648   |          |              |
|         | FAT1     | chr4:187538941      | frameshift_variant | c.8799delA           | p.Gly2934ValfsTer3   |          |           | 6740     | 0.00178   |          |              |
|         | DAXX     | chr6:33287898       | inframe_deletion   | c.1353_1355delGGA    | p.Glu457del          |          |           | 1715     | 0.0222    |          |              |
|         | H3F3A    | chr1:226252135      | missense_variant   | c.83A>T              | p.Lys28Met           |          |           | 368      | 0.18207   |          |              |
|         | FGFR3    | chr4:1807891        | missense_variant   | c.1950G>T            | p.Lys650Asn          |          |           | 775      | 0.08774   |          |              |
|         | TP53     | chr17:7574003       | frameshift_variant | c.1024delC           | p.Arg342GlnfsTer3    |          |           | 403      | 0.134     |          |              |
|         | TP53     | chr17:7578538       | missense_variant   | c.392A>T             | p.Asn131Ile          |          |           | 385      | 0.15844   |          |              |
| RD887   | H3F3A    | chr1:226252135      | missense_variant   | c.83A>T              | p.Lys28Met           | 1818     | 0.282     | negative | negative  |          |              |
|         | H3F3A    | chr1:226252135      | missense_variant   | c.83A>T              | p.Lys28Met           | 2356     | 0.294     | 287      | 0.07317   | negative | negative     |
|         | NF1      | chr17:29677238      | stop_gained        | c.7359C>A            | p.Cys2453Ter         | 2119     | 0.423     | 957      | 0.12762   | negative | negative     |
|         | FGFR1    | chr8:38274849       | missense_variant   | c.1632C>A            | p.Asn544Lys          | 2440     | 0.457     | 690      | 0.12754   | negative | negative     |
|         | PPM1D    | chr17:58740668      | stop_gained        | c.1573G>T            | p.Glu525Ter          | 3247     | 0.477     | 1337     | 0.10928   | negative | negative     |
|         | ATRX     | chrX:76937609       | stop_gained        | c.3139A>T            | p.Lys1047Ter         | 1085     | 0.944     | 475      | 0.2       | negative | negative     |
|         | FAT1     | chr4:187539275      | missense_variant   | c.8465T>C            | p.Leu2822Pro         | negative | negative  | 420      | 0.0119    | negative | negative     |
|         | H3F3A    | chr1:226252135      | missense_variant   | c.83A>T              | p.Lys28Met           | 2357     | 0.399     | 262      | 0.20229   | negative | negative     |
|         | BRAF     | chr7:140624440      | missense_variant   | c.84G>A              | p.Asp22Asn           | negative | negative  | 171      | 0.04094   | negative | negative     |
|         | PDGFRA   | chr4:55144148       | missense_variant   | c.1977C>A            | p.Asn659Lys          | negative | negative  | 788      | 0.00508   | negative | negative     |
|         | TP53     | chr17:7578457       | missense_variant   | c.473G>T             | p.Arg158Leu          | 1815     | 0.733     | 249      | 0.36145   | negative | negative     |
| RD997   | H3F3A    | chr1:226252135      | missense_variant   | c.83A>T              | p.Lys28Met           | 3655     | 0.583     | 610      | 0.51803   | negative | negative     |
| RD998   | ACVR1    | chr2:158622516      | missense_variant   | c.983G>A             | p.Gly328Glu          | 2414     | 0.437     | 471      | 0.00212   | negative | negative     |
| RD999   |          |                     |                    |                      |                      |          |           |          |           |          |              |
|         | RGPD3    | chr2:107049425      | missense_variant   | c.2435T>G            | p.Leu812Arg          |          |           | 2181     | 0.02662   |          |              |
|         | MYC      | chr8:128750605      | inframe_deletion   | c.154_156delCAG      | p.Gln52del           |          |           | 7488     | 0.00281   |          |              |
|         | H3F3A    | chr1:226252135      | missense_variant   | c.83A>T              | p.Lys28Met           | 2711     | 0.491     | 471      | 0.04459   |          |              |
|         | TP53     | chr17:7577538       | missense_variant   | c.743G>A             | p.Arg248Gln          | 1347     | 0.829     | 650      | 0.01538   |          |              |
|         | TP53     | chr17:7578457       | missense_variant   | c.473G>T             | p.Arg158Leu          | 1649     | 0.081     | -1712    | 0.00287   |          |              |
|         | H3F3A    | chr1:226252135      | missense_variant   | c.83A>T              | p.Lys28Met           | 1562     | 0.589     | 239      | 0.35146   |          |              |
|         | TP53     | chr17:7577538       | missense_variant   | c.743G>A             | p.Arg248Gln          | 1041     | 0.883     | 387      | 0.47287   |          |              |
|         | TP53     | chr17:7577547       | missense_variant   | c.734G>A             | p.Gly245Asp          | 2119     | 0.949     | 531      | 0.02642   | negative | negative     |
|         | ATRX     | chrX:76855028       | frameshift_variant | c.5807_5808delIAG    | p.Lys1936ArgfsTer5   | 2608     | 0.408     | 592      | 0.02373   | negative | negative     |
|         | IDH1     | chr2:209113113      | missense_variant   | c.394C>G             | p.Arg132Gly          | 1895     | 0.466     | 832      | 0.03606   | negative | negative     |
|         | ACVR1    | chr2:158617589      | missense_variant   | c.1067G>A            | p.Gly356Asp          | 2536     | 0.579     | 569      | 0.41373   |          |              |
|         | PIK3CA   | chr3:178952084      | missense_variant   | c.3139C>T            | p.His1047Tyr         | 1728     | 0.428     | 405      | 0.24691   |          |              |
|         | PIK3CA   | chr3:178936091      | missense_variant   | c.1633G>A            | p.Glu545Lys          | 1492     | 0.421     | 503      | 0.30739   |          |              |
|         | HIST1H3B | chr6:26032206       | missense_variant   | c.83A>T              | p.Lys28Met           | 1281     | 0.45      | 399      | 0.23058   |          |              |
|         | IDH1     | chr2:209113113      | missense_variant   | c.394C>T             | p.Arg132Cys          | 1853     | 0.438     | 306      | 0.02288   |          |              |
|         | TP53     | chr17:7578212       | stop_gained        | c.637C>T             | p.Arg213Ter          | 2204     | 0.858     | 340      | 0.03529   |          |              |
|         | ATRX     | chrX:76944310       | splice_donor_varia | c.594+1G>C           | .                    | 51       | 0.373     | 281      | 0.01068   |          |              |
|         | IDH1     | chr2:209113113      | missense_variant   | c.394C>G             | p.Arg132Gly          | 47       | 0.298     | -505     | 0.00988   |          |              |
|         | TP53     | chr17:7577121       | missense_variant   | c.817C>T             | p.Arg273Cys          | 39       | 0.846     | 391      | 0.00767   |          |              |
|         | H3F3A    | chr1:226252135      | missense_variant   | c.83A>T              | p.Lys28Met           | 38       | 0.289     | 2141     | 0.00467   |          |              |
|         | TP53     | chr17:7577547       | missense_variant   | c.734G>A             | p.Gly245Asp          | 52       | 0.173     | 2541     | 0.00158   |          |              |
|         | PPM1D    | chr17:58740381      | frameshift_variant | c.1288delG           | p.Val430Ter          | 36       | 0.556     | 4064     | 0.00591   |          |              |
|         | H3F3A    | chr1:226252135      | missense_variant   | c.83A>T              | p.Lys28Met           | 43       | 0.256     | 188      | 0.01596   |          |              |
|         | PIK3CA   | chr3:178936095      | missense_variant   | c.1637A>C            | p.Gln546Pro          | 46       | 0.152     | negative | negative  |          |              |
|         | ATRX     | chrX:76849193       | missense_variant   | c.6083G>C            | p.Arg2028Pro         | 18       | 0.667     | -547     | 0.00192   |          |              |
|         | TP53     | chr17:7577094       | missense_variant   | c.844C>T             | p.Arg282Trp          | 30       | 0.333     | negative | negative  |          |              |
|         | H3F3A    | chr1:226252135      | missense_variant   | c.83A>T              | p.Lys28Met           | 36       | 0.333     | -534     | 0.04216   |          |              |
|         | TP53     | chr17:7577094       | missense_variant   | c.844C>T             | p.Arg282Trp          | 32       | 0.844     | 429      | 0.05361   |          |              |
|         | TP53     | chr17:7579398       | frameshift_variant | c.289delG            | p.Val97SerfsTer26    | 29       | 0.897     | 1711     | 0.42782   |          |              |
|         | PDGFRA   | chr4:55138664       | missense_variant   | c.1341G>C            | p.Trp447Cys          | 381      | 0.467     | 9811     | 0.37949   |          |              |
|         | HIST1H3B | chr6:26032206       | missense_variant   | c.83A>T              | p.Lys28Met           | 31       | 0.323     | 660      | 0.24431   |          |              |
| RE668   | KIT      | chr4:55598125       | frameshift_variant | c.2323delC           | p.Gln775ArgfsTer39   | negative | negative  | 255      | 0.01961   |          |              |
|         | H3F3A    | chr1:226252135      | missense_variant   | c.83A>T              | p.Lys28Met           | 33       | 0.424     | 159      | 0.13836   |          |              |
|         | TP53     | chr17:7577121       | missense_variant   | c.817C>T             | p.Arg273Cys          | 17       | 0.647     | 220      | 0.1       |          |              |
|         | H3F3A    | chr1:226252135      | missense_variant   | c.83A>T              | p.Lys28Met           | 35       | 0.457     | 102      | 0.12745   |          |              |
|         | TP53     | chr17:7578406       | missense_variant   | c.524G>A             | p.Arg175His          | 76       | 0.632     | 331      | 0.10272   |          |              |
|         | PDGFRA   | chr4:55131161       | missense_variant   | c.704G>A             | p.Cys235Tyr          | 247      | 0.551     | 352      | 0.12784   |          |              |
|         | KDR      | chr4:55981531       | missense_variant   | c.406G>A             | p.Val136Met          |          |           | 241      | 0.48963   |          |              |
|         | FAT1     | chr4:187542767      | missense_variant   | c.4973C>A            | p.Thr1658Lys         |          |           | 306      | 0.47541   |          |              |
|         | ATRX     | chrX:76938047       | missense_variant   | c.2701A>G            | p.Ile901Val          |          |           | 126      | 1         |          |              |
|         | H3F3A    | chr1:226252135      | missense_variant   | c.83A>T              | p.Lys28Met           | 48       | 0.708     | 233      | 0.58369   |          |              |
|         | TP53     | chr17:7577538       | missense_variant   | c.743G>A             | p.Arg248Gln          | 26       | 0.385     | 501      | 0.44511   |          |              |
|         | PTEN     | chr10:89690802      | splice_acceptor_vr | c.210-1G>T           | .                    | 32       | 0.812     | 85       | 0.72941   |          |              |
|         | TP53     | chr17:7578475       | missense_variant   | c.455C>G             | p.Pro152Arg          | 40       | 0.575     | 1101     | 0.44505   |          |              |
|         | H3F3A    | chr1:226252135      | missense_variant   | c.83A>T              | p.Lys28Met           | negative | negative  | 6867     | 0.0103    |          |              |
|         | TP53     | chr17:7577095       | missense_variant   | c.843C>G             | p.Asp281Glu          | 1838     | 0.463     | negative | negative  |          |              |
|         | TP53     | chr17:7578394       | missense_variant   | c.536A>C             | p.His179Pro          | 1357     | 0.384     | negative | negative  |          |              |
|         | EGFR     | chr7:55249005       | missense_variant   | c.2303G>T            | p.Ser768Ile          | negative | negative  | 94       | 0.07447   |          |              |
|         | H3F3A    | chr1:226252135      | missense_variant   | c.83A>T              | p.Lys28Met           | 51       | 0.745     | 941      | 0.63124   |          |              |
|         | MET      | chr7:116397695      | missense_variant   | c.1969C>T            | p.Pro657Ser          | negative | negative  | 1817     | 0.17942   |          |              |
|         | PPM1D    | chr17               |                    |                      |                      |          |           |          |           |          |              |

|       |          |                |                     |                      |                    |      |          |          |          |          |  |  |
|-------|----------|----------------|---------------------|----------------------|--------------------|------|----------|----------|----------|----------|--|--|
| RE967 | EGFR     | chr7:55249005  | missense_variant    | c.2303G>T            | p.Ser768Ile        |      |          |          | 78       | 0.11538  |  |  |
|       | FAT1     | chr4:187541712 | stop_gained         | c.6028G>T            | p.Glu2010Ter       | 40   | 0.575    |          | 214      | 0.00935  |  |  |
|       | TP53     | chr17:7577570  | missense_variant    | c.711G>T             | p.Met237Ile        | 31   | 0.935    |          | -196     | 0.01209  |  |  |
| RE970 | ATRX     | chrX:76938573  | frameshift_variant  | c.2174_2175delTG     | p.Val725GlyfsTer7  | 40   | 0.4      |          | 141      | 0.02837  |  |  |
|       | IDH1     | chr2:209113113 | missense_variant    | c.394C>G             | p.Arg132Gly        | 34   | 0.382    |          | 95       | 0.01053  |  |  |
| RE971 |          |                |                     |                      |                    |      |          |          | negative | negative |  |  |
| RE972 | H3F3A    | chr1:226252135 | missense_variant    | c.83A>T              | p.Lys28Met         |      |          |          | 128      | 0.23438  |  |  |
|       | TP53     | chr17:7574003  | stop_gained         | c.1024C>T            | p.Arg342Ter        |      |          |          | 185      | 0.23243  |  |  |
|       | H3F3A    | chr1:226252135 | missense_variant    | c.83A>T              | p.Lys28Met         | 37   | 0.541    |          | 118      | 0.01695  |  |  |
| RE974 | NF1      | chr17:29422329 | start_lost          | c.2T>G               | p.Met1?            | 46   | 0.5      | negative |          | negative |  |  |
|       | NF1      | chr17:29654859 | splice_donor_varia  | c.5609+2T>G          | .                  | 34   | 0.242    |          | 361      | 0.00277  |  |  |
| RE976 | TSC2     | chr16:2137925  | splice_donor_varia  | c.5069-47_5068+27del | .                  |      |          |          | 261      | 0.11494  |  |  |
|       | HIST1H3B | chr6:26032069  | missense_variant    | c.220G>A             | p.Glu74Lys         |      | negative | negative | 1233     | 0.00568  |  |  |
|       | NF1      | chr17:29553492 | stop_gained         | c.2041C>T            | p.Arg681Ter        |      | negative | negative | 983      | 0.00713  |  |  |
| RF007 | PIK3CA   | chr3:178936091 | missense_variant    | c.1633G>A            | p.Glu545Lys        | 1681 | 0.403    |          | 950      | 0.21263  |  |  |
|       | PPM1D    | chr17:58740623 | frameshift_variant  | c.1535dupA           | p.Asn512LysfsTer16 | 2695 | 0.843    |          | -1640    | 0.29508  |  |  |
|       | TP53     | chr17:7579315  | frameshift_variant  | c.371dupG            | p.Cys124TrpfsTer25 | 29   | 1        |          | 1363     | 0.4207   |  |  |
| RF008 | H3F3A    | chr1:226252135 | missense_variant    | c.83A>T              | p.Lys28Met         | 47   | 0.681    |          | 813      | 0.32718  |  |  |
|       | PDGFRA   | chr4:55133846  | inframe_deletion    | c.1064_1069delCTCTG  | p.Thr355_Leu356del | 530  | 0.904    |          | 1667     | 0.21476  |  |  |
|       | H3F3A    | chr1:226252135 | missense_variant    | c.83A>T              | p.Lys28Met         | 1978 | 0.419    |          | 157      | 0.28025  |  |  |
|       | PDGFRA   | chr4:55152093  | missense_variant    | c.2525A>T            | p.Asp842Val        | 6125 | 0.069    |          | 199      | 0.06533  |  |  |
| RF009 | TP53     | chr17:7578370  | splice_donor_varia  | c.559+1G>A           | .                  | 1345 | 0.03     |          | 166      | 0.08434  |  |  |
|       | PDGFRA   | chr4:55133725  | missense_variant    | c.938G>A             | p.Gly313Asp        | 8269 | 0.327    | negative |          | negative |  |  |
|       | TP53     | chr17:7576920  | splice_acceptor_var | c.920-3_926delTAGCA  | .                  | 1653 | 0.388    |          | 175      | 0.02857  |  |  |
|       | H3F3A    | chr1:226252135 | missense_variant    | c.83A>T              | p.Lys28Met         |      | negative | negative | 124      | 0.15323  |  |  |
|       | MLH1     | chr3:37053568  | missense_variant    | c.655A>G             | p.Ile219Val        | 2234 | 0.462    | negative |          | negative |  |  |
|       | MSH6     | chr2:48027683  | missense_variant    | c.2561A>T            | p.Lys854Met        | 2988 | 0.502    | negative |          | negative |  |  |
|       | RGPD3    | chr2:107040372 | missense_variant    | c.4051G>C            | p.Glu1351Gln       | 2794 | 0.487    | negative |          | negative |  |  |
|       | ATRX     | chrX:76937963  | missense_variant    | c.2785C>G            | p.Gln929Glu        | 2596 | 0.999    | negative |          | negative |  |  |
|       | BRCA2    | chr13:32937526 | missense_variant    | c.8187G>T            | p.Lys2729Asn       | 3107 | 0.487    | negative |          | negative |  |  |
|       | EGFR     | chr7:55229255  | missense_variant    | c.1562G>A            | p.Arg521Lys        | 3059 | 0.509    |          | 318      | 0.01258  |  |  |
| RF010 | FGFR1    | chr8:38287238  | missense_variant    | c.320C>T             | p.Ser107Leu        | 1911 | 0.481    | negative |          | negative |  |  |
|       | FGFR3    | chr4:1806569   | missense_variant    | c.1285G>A            | p.Ala429Thr        | 2849 | 0.507    | negative |          | negative |  |  |
|       | MSH6     | chr2:48010488  | missense_variant    | c.116G>A             | p.Gly39Glu         | 1799 | 0.495    | negative |          | negative |  |  |
|       | PIK3R1   | chr5:67588148  | missense_variant    | c.978G>A             | p.Met326Ile        | 2641 | 0.472    | negative |          | negative |  |  |
|       | PMS2     | chr7:6026988   | missense_variant    | c.1408C>T            | p.Pro470Ser        | 3740 | 0.999    |          | 530      | 0.00189  |  |  |
|       | SETD2    | chr3:47125385  | missense_variant    | c.5885C>T            | p.Pro1962Leu       | 3402 | 0.483    |          | 435      | 0.0046   |  |  |
|       | TP53     | chr17:7579472  | missense_variant    | c.215C>G             | p.Pro72Arg         | 2569 | 0.999    |          | 264      | 0.07197  |  |  |
|       | PDGFRA   | chr4:55139771  | missense_variant    | c.1432T>C            | p.Ser478Pro        | 2683 | 0.486    | negative |          | negative |  |  |
|       | H3F3A    | chr1:226252135 | missense_variant    | c.83A>T              | p.Lys28Met         | 2265 | 0.422    |          | 321      | 0.26791  |  |  |
| RF177 | FGFR1    | chr8:38274849  | missense_variant    | c.1638C>A            | p.Asn546Lys        | 1875 | 0.825    |          | 249      | 0.15663  |  |  |
|       | BCOR     | chrX:39914648  | frameshift_variant  | c.4611_4612delCA     | p.His1537GlnfsTer2 | 2256 | 0.389    |          | 259      | 0.04247  |  |  |
|       | H3F3A    | chr1:226252135 | missense_variant    | c.83A>T              | p.Lys28Met         | 2469 | 0.541    |          | 558      | 0.35663  |  |  |
| RF178 | TP53     | chr17:7577120  | missense_variant    | c.818G>A             | p.Arg273His        | 1383 | 0.802    |          | 636      | 0.55363  |  |  |
|       | H3F3A    | chr1:226252135 | missense_variant    | c.83A>T              | p.Lys28Met         | 2054 | 0.466    |          | 689      | 0.40784  |  |  |
| RF181 | TP53     | chr17:7577550  | inframe_deletion    | c.714_731delTAACAG1  | p.Asn239_Gly244del | 1402 | 0.628    |          | 1081     | 0.34013  |  |  |
|       | PTEN     | chr10:89692905 | frameshift_variant  | c.389delG            | p.Arg130GlnfsTer4  | 1447 | 0.459    | negative |          | negative |  |  |
|       | TP53     | chr17:7577121  | missense_variant    | c.817C>T             | p.Arg273Cys        |      | negative | negative | 561      | 0.01073  |  |  |
| RF182 | H3F3A    | chr1:226252135 | missense_variant    | c.83A>T              | p.Lys28Met         | 1732 | 0.401    |          | -940     | 0.00201  |  |  |
|       | PIK3CA   | chr3:178936082 | missense_variant    | c.1624G>A            | p.Glu542Lys        | 1339 | 0.347    |          | -940     | 0.0039   |  |  |
|       | TP53     | chr17:7577100  | missense_variant    | c.838A>G             | p.Arg280Gly        | 2295 | 0.767    |          | -940     | 0.00667  |  |  |
