# Supplementary material
Source: PubMed Central journal article supplement (PMC7523750)

A

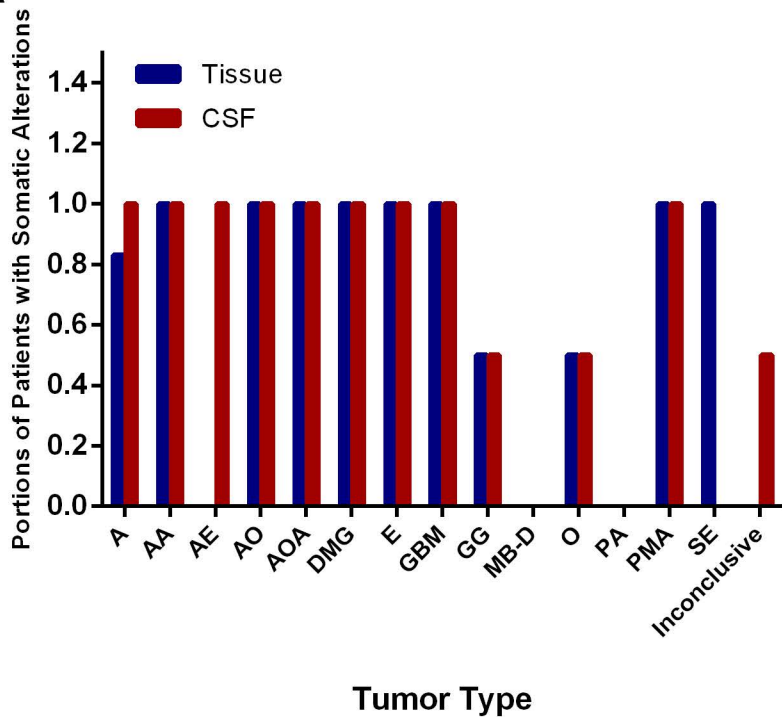

B

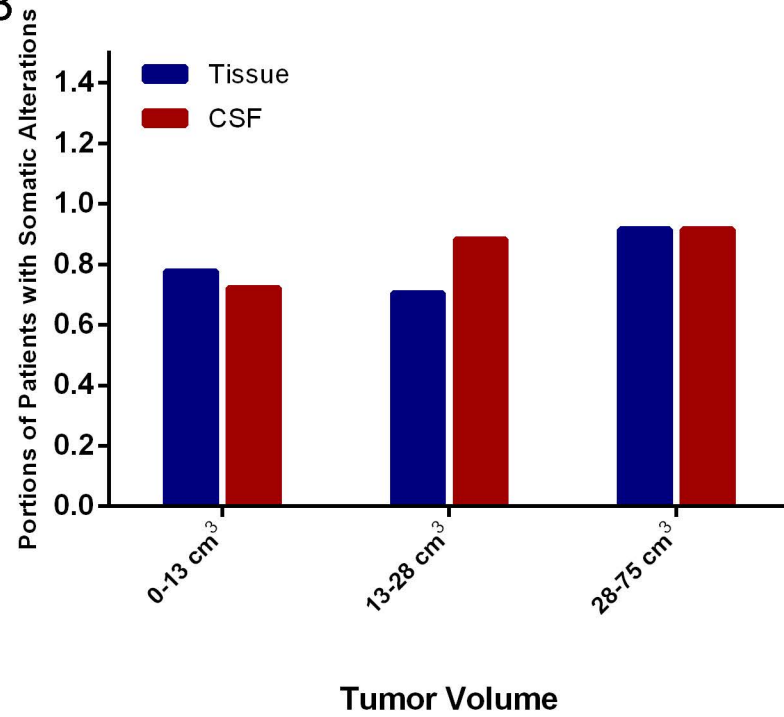

C

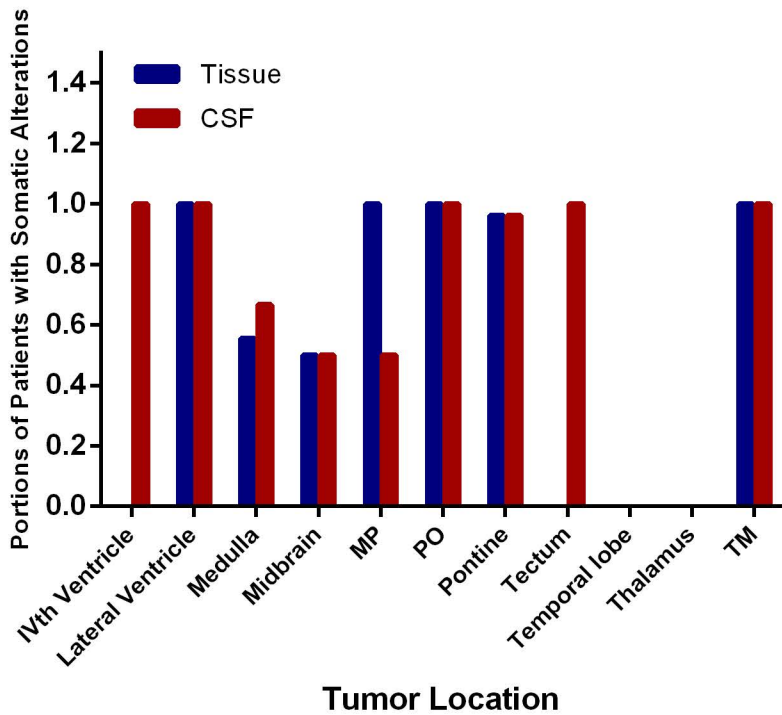

Supplement: NIHMS1630598-supplement-sFig1.pdf [file NIHMS1630598-supplement-sFig1.pdf]
